# Supplementary material
Source: Springer Nature journal article supplement (https://www.springermedizin.de/resource/supplementary/12891_2012_1557_MOESM1_ESM.pdf/9508368)

**a.**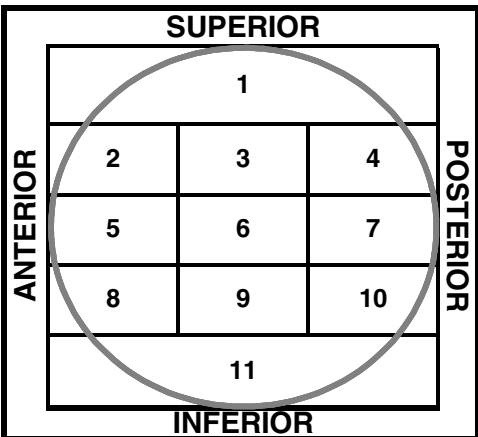**b.**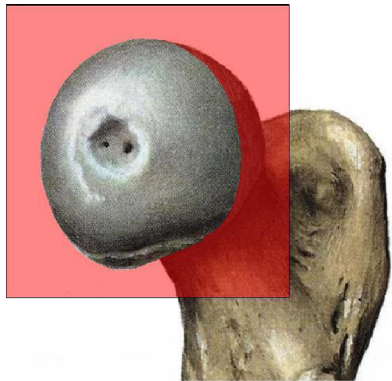

Supplement: MOESM1 [file 9508368]
